# Supplementary material
Source: PubMed Central journal article supplement (PMC9527193)
Supplement: mmc1.pdf [file mmc1.pdf]

Miglani T, Mohammed T, Jensen A, Bregman J. A unique case of orbital inflammatory syndrome following COVID-19 infection. J AAPOS online supplement.

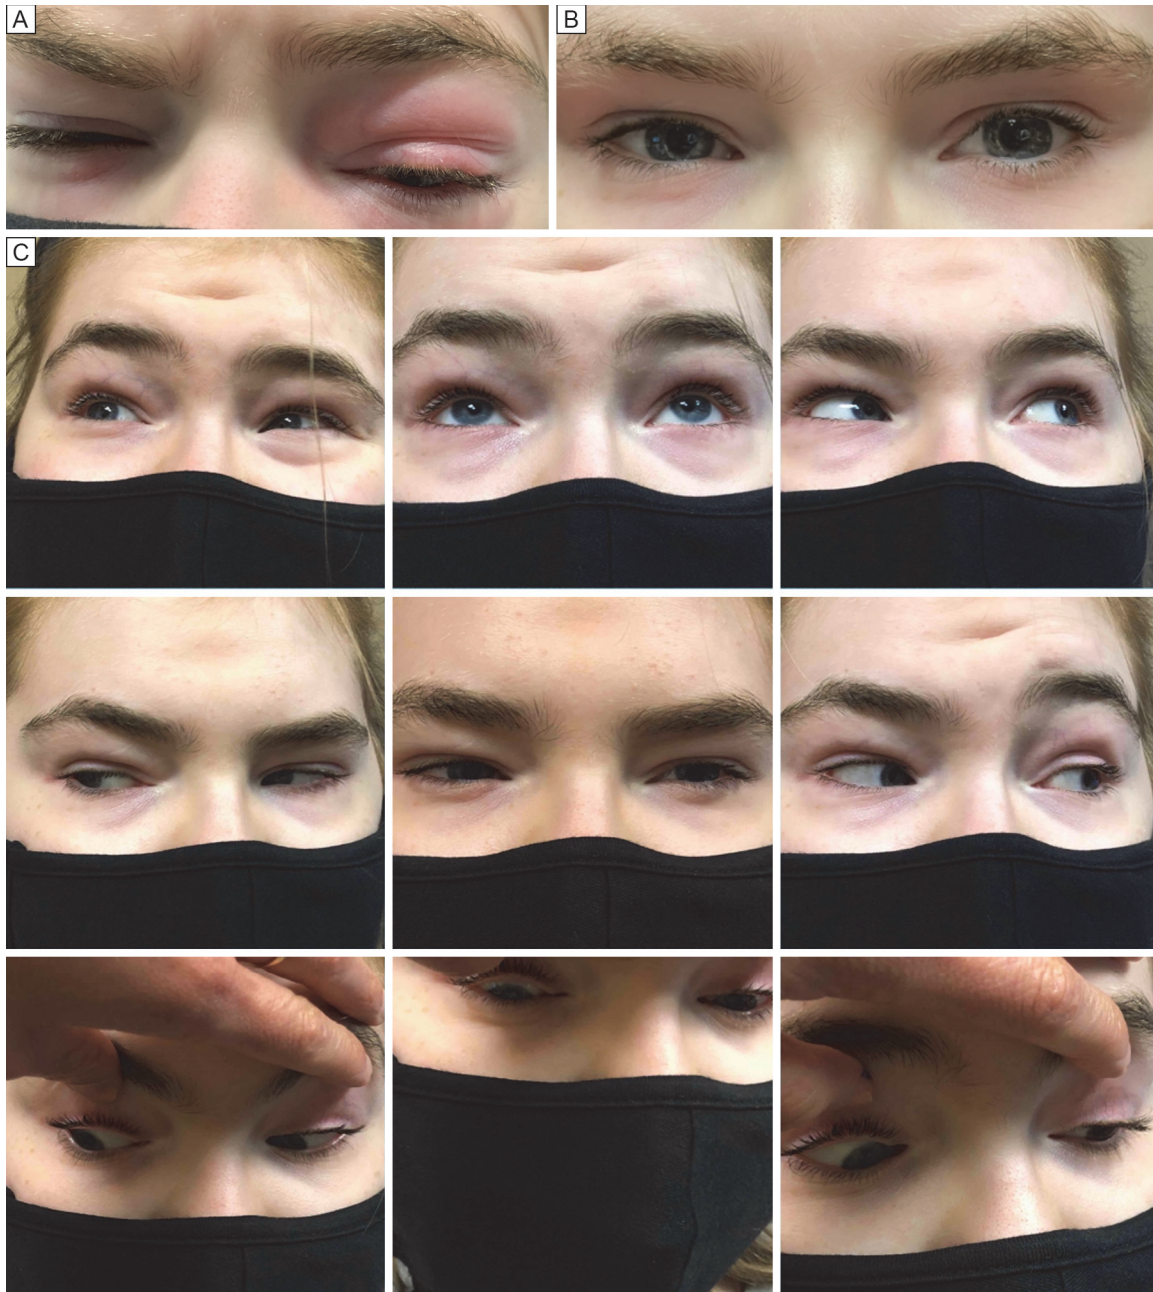

**eSupplement 1.** Clinical photographs of 12-year-old boy with orbital inflammatory disease associated with COVID-19 infection: at presentation (A), showing left eyelid erythema and edema, 1 week after discharge (B), and 3 weeks after discharge (C).
